# Supplementary material
Source: MDPI journal article supplement (https://www.mdpi.com/2227-9717/11/1/115)
Supplement: s1 [file s1]

# Porous Defective Bi/Bi<sub>3</sub>NbO<sub>7</sub> Nanosheets for Efficient Photocatalytic NO Removal under Visible Light

Ting Gao <sup>1,†</sup>, Jingqi Lin <sup>1,†</sup>, Ke Zhang <sup>1</sup>, Mohsen Padervand <sup>2,\*</sup>, Yifan Zhang <sup>3</sup>, Wei Zhang <sup>1</sup>, Menglin Shi <sup>4</sup> and Chuanyi Wang <sup>1,\*</sup>

<sup>1</sup> School of Environmental Science and Engineering, Shaanxi University of Science and Technology, Xi'an 710021, China

<sup>2</sup> Department of Chemistry, Faculty of Science, University of Maragheh, Maragheh P.O. Box 55181-83111, Iran

<sup>3</sup> Xi'an Institute for Innovative Earth Environment Research, Xi'an 710061, China

<sup>4</sup> Missile Engineering College, Rocket Force University of Engineering, Xi'an 710025, China

\* Correspondence: padervand@maragheh.ac.ir (M.P.); wangchuanyi@sust.edu.cn (C.W.)

† These authors contributed equally to this work.

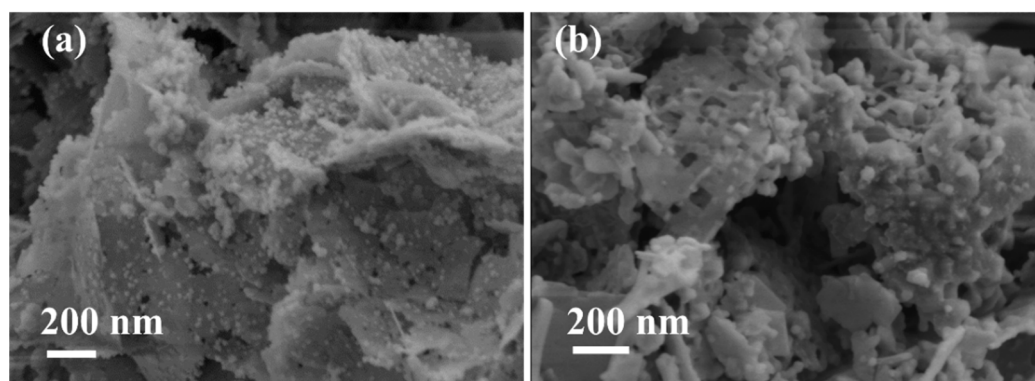

**Figure S1.** The SEM images of 2% Bi-2-BNO (a) before and (b) after the stability test.

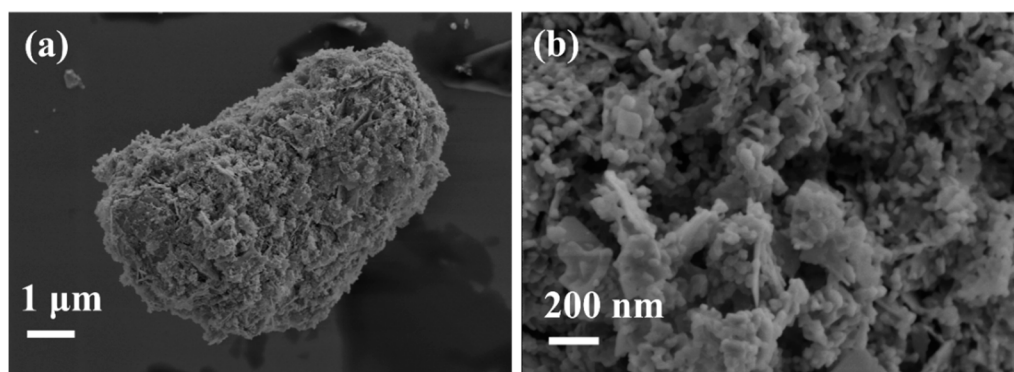

**Figure S2.** The SEM images of 4%Bi-2-BNO.

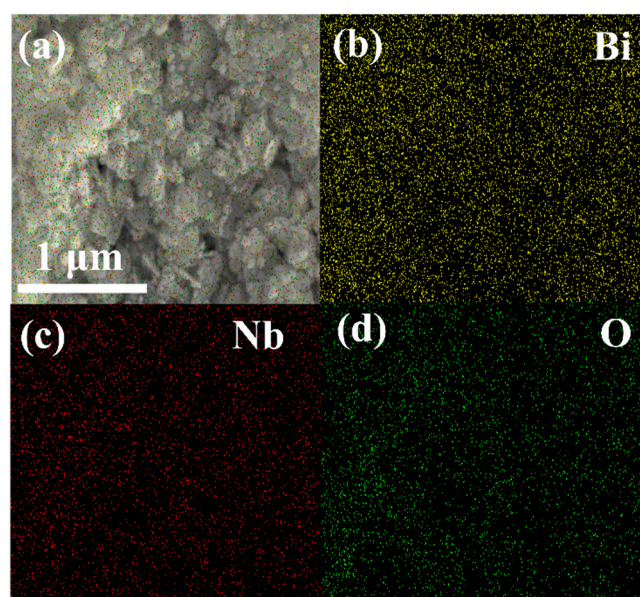

**Figure S3.** Elemental mapping of (a) 2%Bi-2-BNO corresponding to (b) Bi, (c) Nb, and (d) O.
